# Supplementary material
Source: PubMed Central journal article supplement (PMC4860949)

**Antiplasmodial phloroglucinol derivative isolated from *Syncarpia glomulifera*  
(Myrtaceae)**

Qingxi Su <sup>1</sup>, Seema Dalal <sup>2</sup>, Michael Goetz <sup>3</sup>, Maria B. Cassera <sup>2</sup>, David G. I. Kingston <sup>1,\*</sup>

**Affiliation**

<sup>1</sup> Department of Chemistry and Virginia Tech Center for Drug Discovery, Virginia Tech, Blacksburg, Virginia, United States

<sup>2</sup> Department of Biochemistry and Virginia Tech Center for Drug Discovery, Virginia Tech, Blacksburg, Virginia, United States

<sup>3</sup> Natural Products Discovery Institute, Doylestown, PA, 18902, US

# <sup>1</sup>H NMR of compound 1

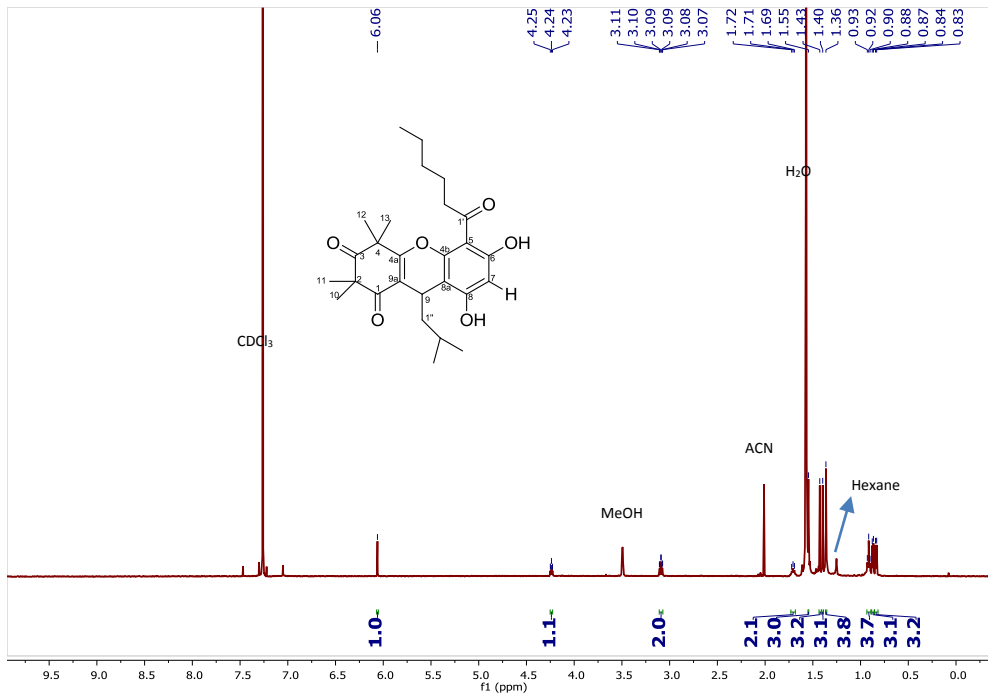

# <sup>13</sup>C NMR of compound 1

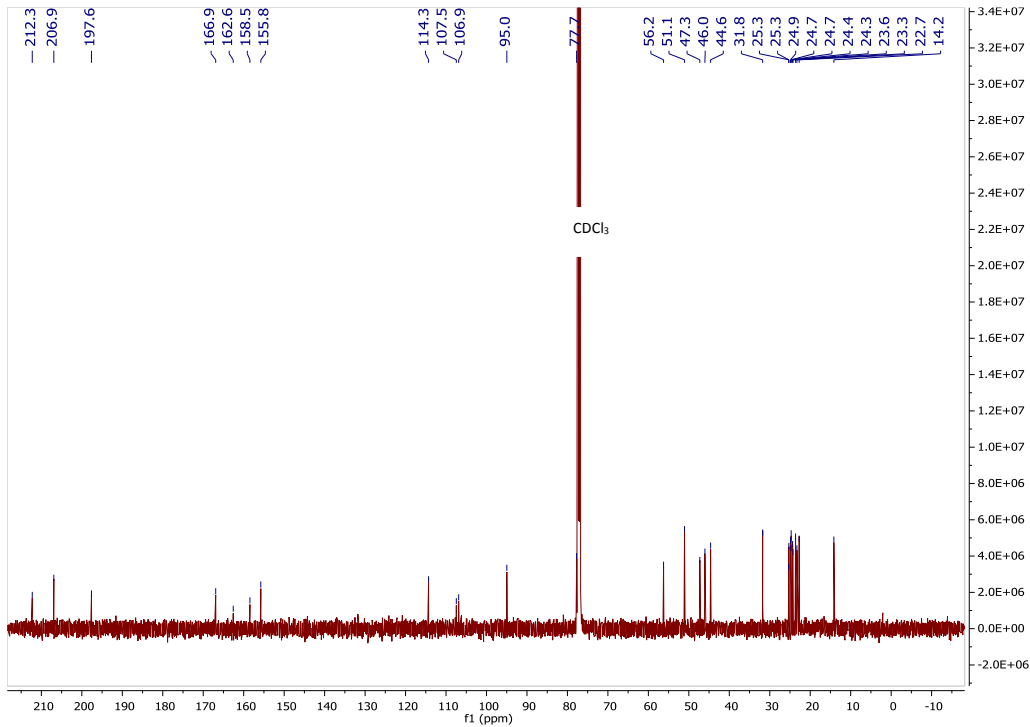

# <sup>1</sup>H NMR of compound 2

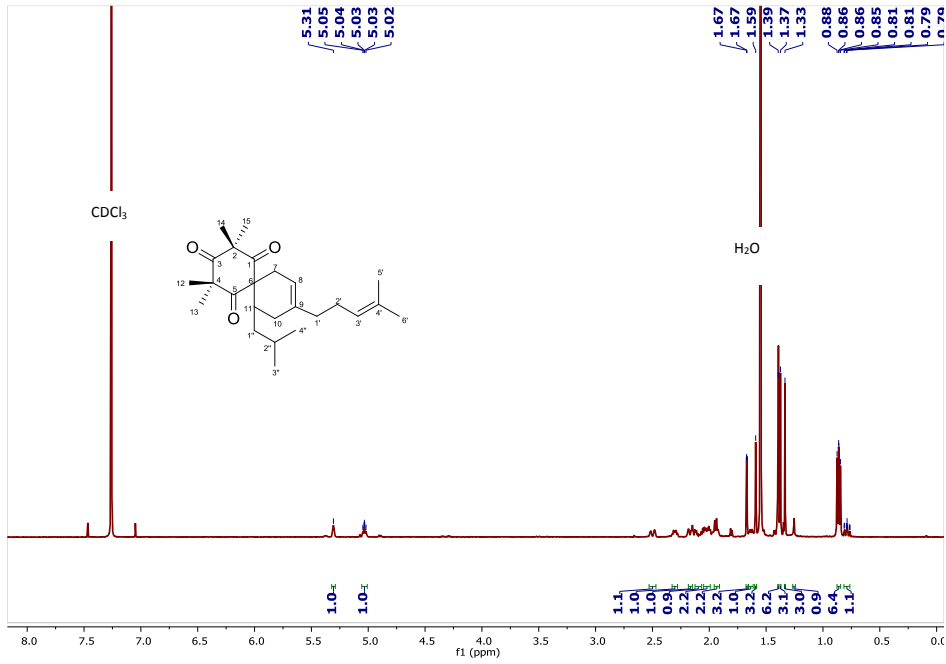

# <sup>13</sup>C NMR of compound 2

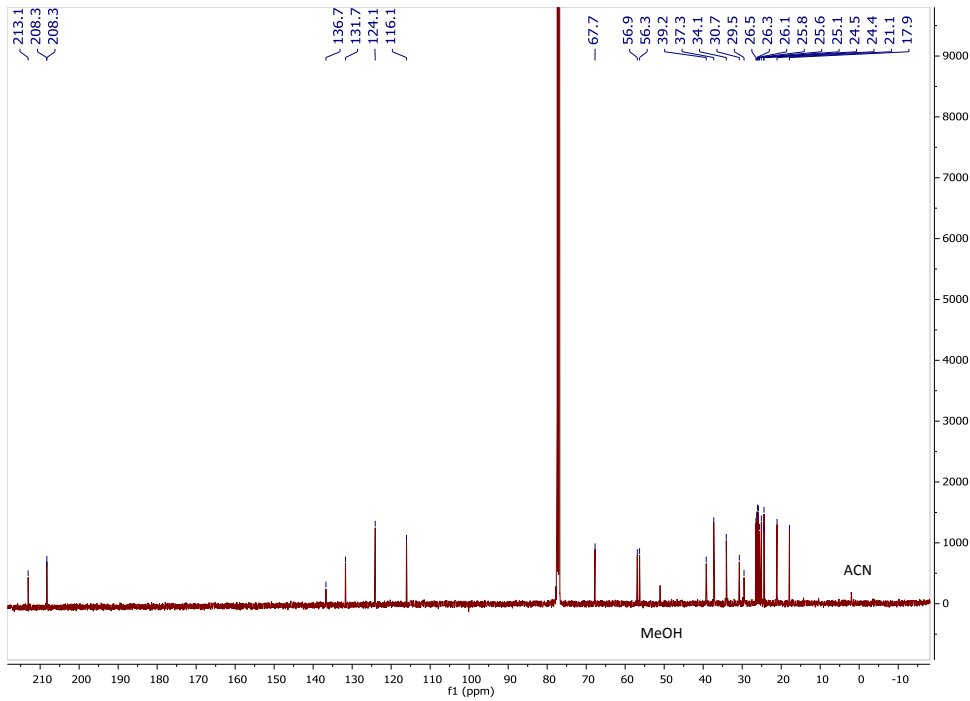

### <sup>1</sup>H NMR of compound 3

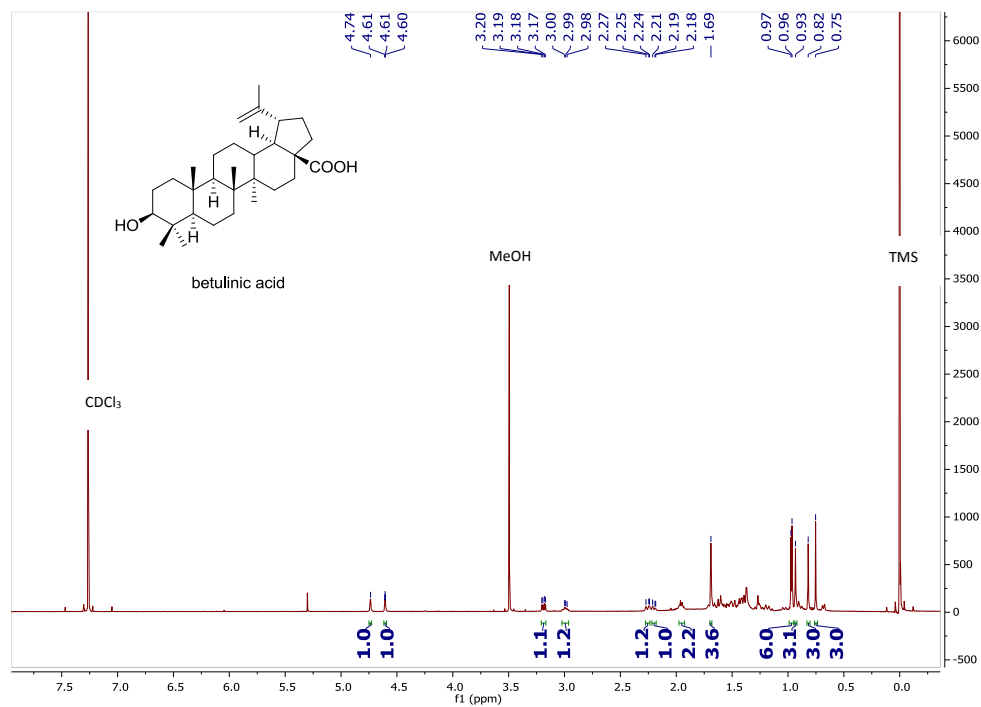

### <sup>1</sup>H NMR of compound 4

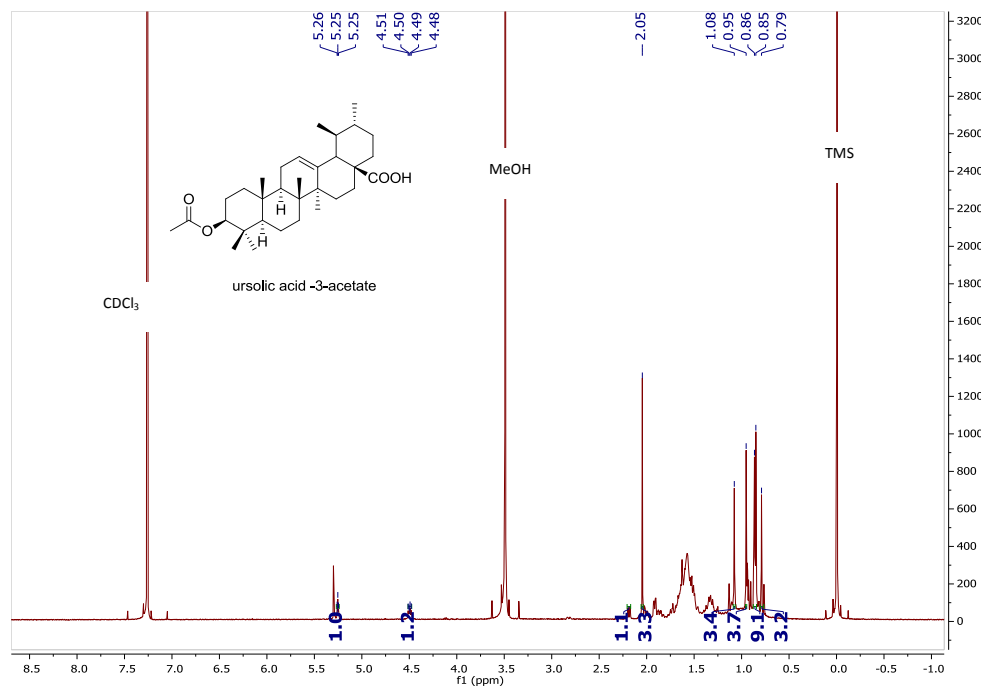

### <sup>1</sup>H NMR of compound 5

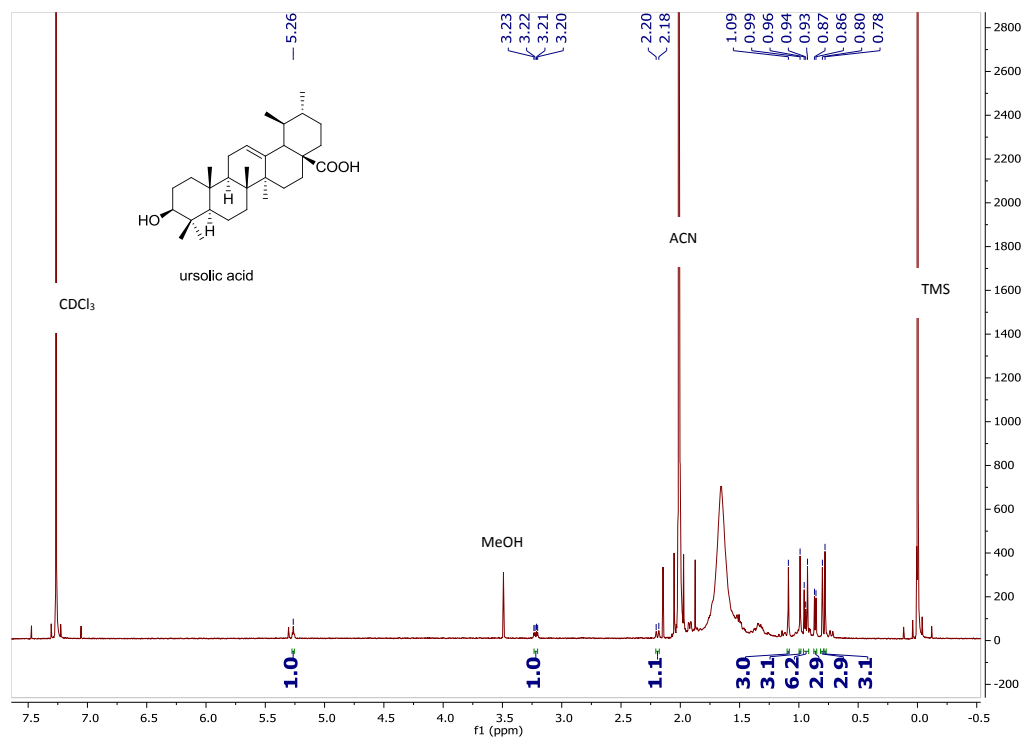

### <sup>1</sup>H NMR of compound 6

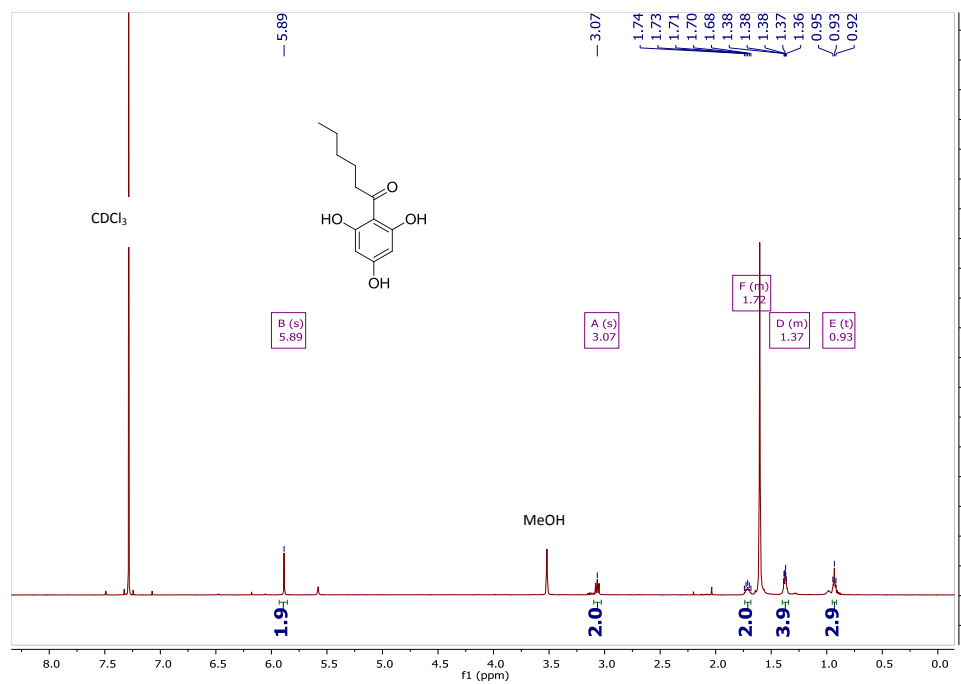

## HPLC purity check of compounds 1-5

### Compound 1

Semipreparative C<sub>18</sub> column (Phenomenex Luna column, 5  $\mu$ m, 250 X10 mm) eluted with a solvent gradient from CH<sub>3</sub>CN:H<sub>2</sub>O, 80:20 to 85:15 from 0 to 10 min, to 90:10 from 10 to 15 min, to 100:0 from 15 to 25 min, ending with 100% CH<sub>3</sub>CN from 25 to 35 min at a flow rate of 2.5 mL/min.

t<sub>R1</sub> 26 min

### UV

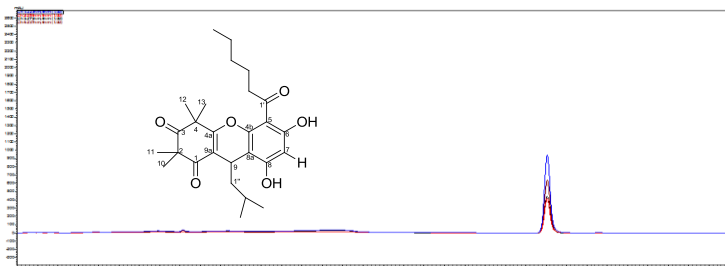

### ELSD

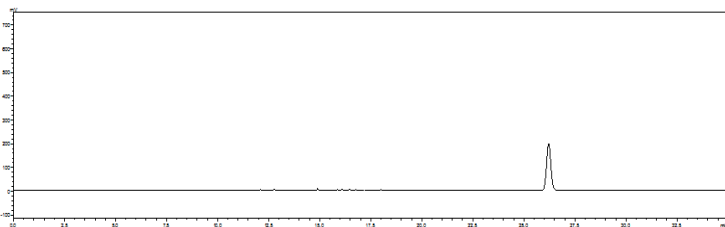

## Compound 2

Analytical C<sub>18</sub> Cogent Bidentate column (4  $\mu$ m, 76 X 4.6 mm) eluted with a solvent gradient from CH<sub>3</sub>CN:H<sub>2</sub>O, 70:30 to 75:25 from 0 to 10 min, to 85:15 from 10 to 20 min, ending with 100% CH<sub>3</sub>CN from 20 to 25 min at a flow rate of 1.5 mL/min.

t<sub>R2</sub> 11.8 min

### ELSD

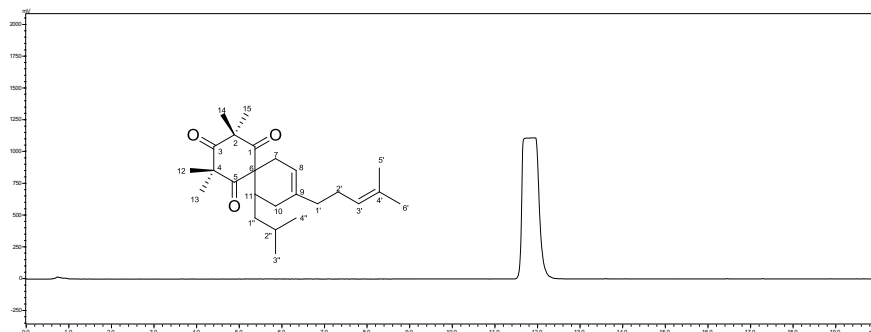

### UV

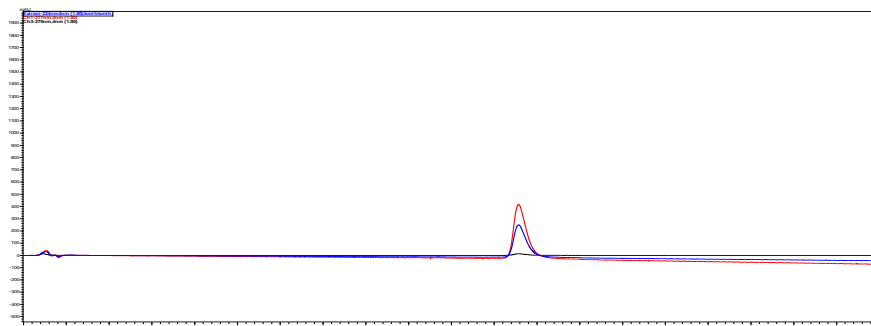

### Compound 3

Analytical C<sub>18</sub> Cogent Bidentate column (4  $\mu$ m, 76 X 4.6 mm) eluted with a solvent gradient from CH<sub>3</sub>CN:H<sub>2</sub>O, 70:30 to 75:25 from 0 to 10 min, to 85:15 from 10 to 20 min, ending with 100% CH<sub>3</sub>CN from 20 to 25 min at a flow rate of 1.5 mL/min.

t<sub>R3</sub> 7.5 min

(sample was dissolved in mixture of MeOH: EtOAc)

### UV

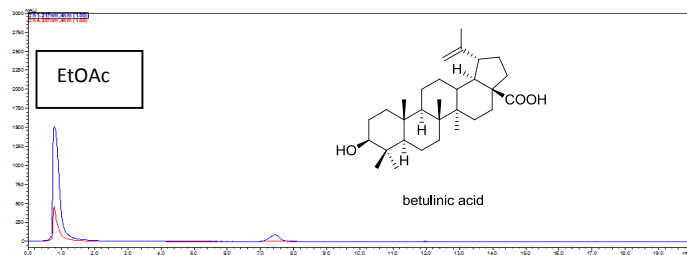

### ELSD

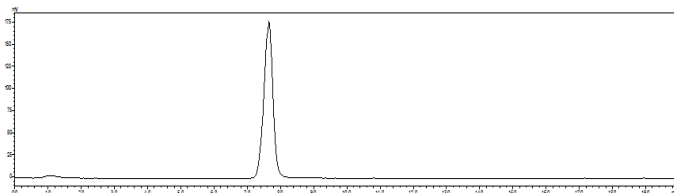



## Compound 4

Analytical C<sub>18</sub> Cogent Bidentate column (4  $\mu$ m, 76 X 4.6 mm) eluted with a solvent gradient from CH<sub>3</sub>CN:H<sub>2</sub>O, 70:30 to 75:25 from 0 to 10 min, to 85:15 from 10 to 20 min, ending with 100% CH<sub>3</sub>CN from 20 to 25 min at a flow rate of 1.5 mL/min.

t<sub>R4</sub> 13 min

### UV

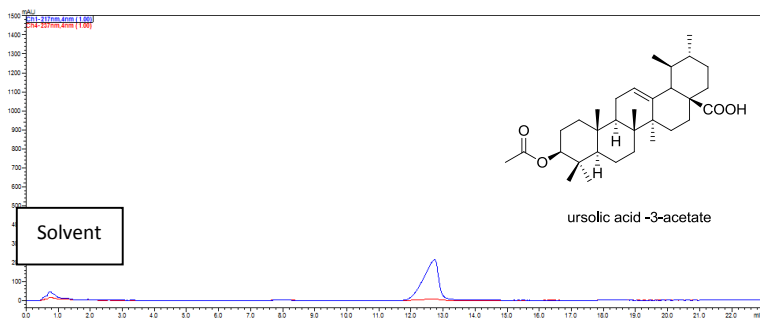

### ELSD

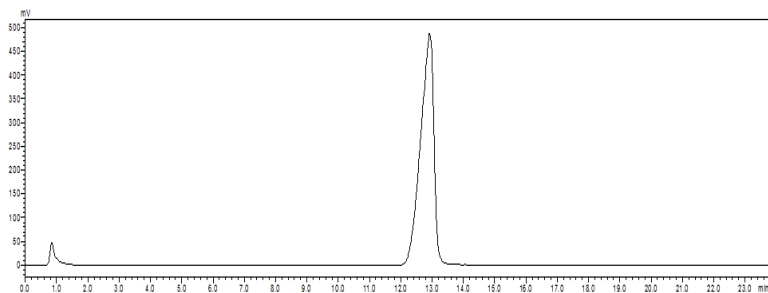

## Compound 5

Analytical C<sub>18</sub> Cogent Bidentate column (4  $\mu$ m, 76 X 4.6 mm) eluted with a solvent gradient from CH<sub>3</sub>CN:H<sub>2</sub>O, 70:30 to 75:25 from 0 to 10 min, to 85:15 from 10 to 20 min, ending with 100% CH<sub>3</sub>CN from 20 to 25 min at a flow rate of 1.5 mL/min.

t<sub>R5</sub> 11 min

### UV

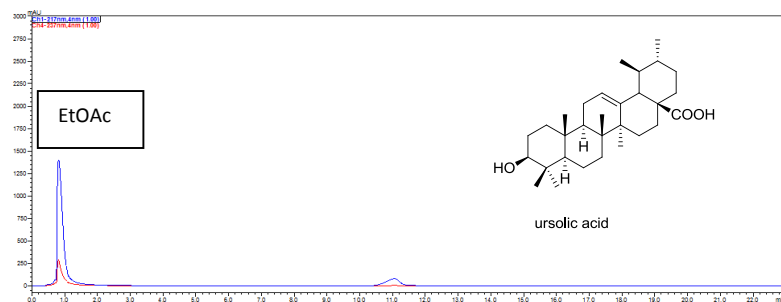

### ELSD

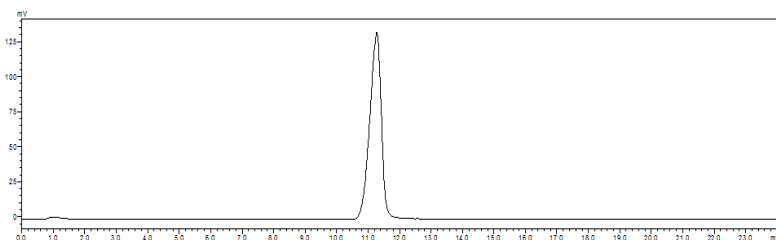

## Compound 6

semipreparative C<sub>18</sub> column (Phenomenex Luna column, 5  $\mu$ m, 250 X10 mm) eluted with a solvent gradient from CH<sub>3</sub>CN:H<sub>2</sub>O, 50:50 to 65:35 from 0 to 15 min, to 80:20 from 15 to 20 min, ending with 100% CH<sub>3</sub>CN from 20 to 25 min at a flow rate of 2.5 mL/min.

t<sub>R6</sub> 17.5 min

### UV

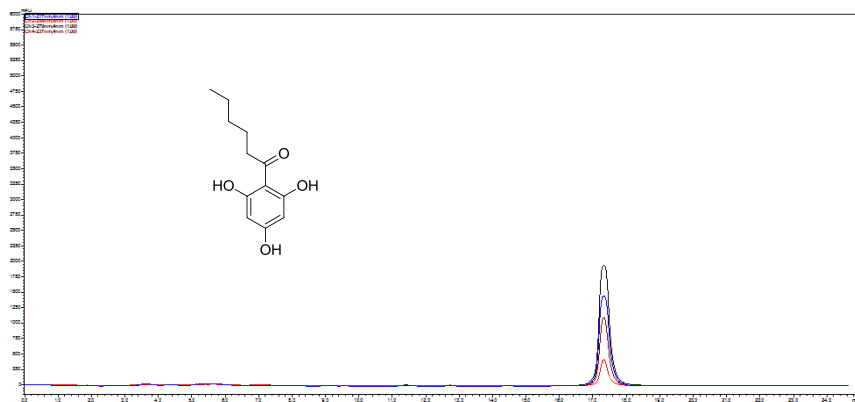

### ELSD

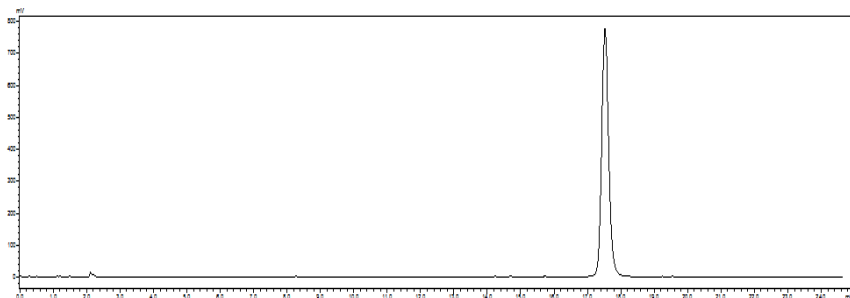

Supplement: NIHMS781018-supplement.pdf [file NIHMS781018-supplement.pdf]
